# Striatal dynamics explain duration judgments

Thiago S. Gouvêa<sup>\*,1</sup>, Tiago Monteiro<sup>\*,1</sup>, Asma Motiwala<sup>1</sup>, Sofia Soares<sup>1</sup>, Christian K. Machens<sup>1</sup>, Joseph J. Paton<sup>1</sup>

<sup>\*</sup>Co-authors

<sup>1</sup>Champalimaud Neuroscience Programme, Champalimaud Centre for the Unknown, Lisbon 1400-038, Portugal

Address for correspondence:

Joseph J. Paton

Champalimaud Neuroscience Programme

Champalimaud Centre for the Unknown

Av de Brasília s/n, Doca de Pedrouços

1400-038

Lisbon, Portugal

**[joe.paton@neuro.fchampalimaud.org](mailto:joe.paton@neuro.fchampalimaud.org)**

Time, like space, is a fundamental dimension of the environment, yet how time is processed in the brain is poorly understood. Prior studies have shown that population dynamics in a number of brain areas encode information about the passage of time<sup>1-9,23-25</sup>. However, it is not known whether such temporal representations inform subjects' judgments of duration or merely covary with elapsing time. The striatum is an input structure of the basal ganglia implicated in several time-dependent functions such as reinforcement learning, decision making, and interval timing<sup>1,10-15</sup>. To determine whether striatal ensembles drive subjects' judgments of duration, we manipulated and recorded from striatal neurons in rats performing a duration categorization psychophysical task. We found that striatal neurons displayed diverse firing patterns and that the dynamics of these patterns predicted duration judgments. In fact, using the state of a simultaneously recorded ensemble to judge duration produced performance that matched that of the animal. Importantly, these findings were not explained by the immediate sensorimotor state of the animals as assessed by analysis of high speed video of behavior. Furthermore, striatal neurons were necessary for duration judgments, as infusions of the GABA<sub>A</sub> agonist muscimol into the striatum produced a specific impairment in the duration sensitivity of animals' judgments. Lastly, we show that elapsing time, the relevant decision variable for the task, was encoded by striatal populations and ran faster or slower when rats judged a given duration as longer or shorter, respectively. These results demonstrate that striatal dynamics form an internal "neural population clock"<sup>16-17</sup> that supports the fundamental ability of animals to judge the passage of time.

To measure the duration sensitivity of subjects' timing judgments, we trained rats to judge whether time intervals belonged to a long or short category<sup>18</sup> (see Methods; Figure 1a). At each self-initiated trial, two brief tones (interval onset, offset) were presented separated in time by an interval randomly selected from the set  $I = \{0.6, 1.05, 1.26, 1.38, 1.62, 1.74, 1.95, 2.4\}$  seconds. Judgments about interval duration were reported at two laterally located nose ports: choosing the left side was reinforced with water after intervals longer than 1.5 seconds (long stimuli), and the right side otherwise (short stimuli, Figure 1b). Animals were required to withhold choice until interval offset. Animals made virtually no errors when categorizing the easiest (i.e. shortest and longest) intervals, but categorization performance declined as intervals approached the 1.5 seconds categorical boundary (Figure 1c).

Several lines of evidence implicate the striatum in interval timing<sup>1-4,10-14</sup>, but whether striatal neural activity can explain the perceptual performance of behaving subjects is unknown. We recorded action potentials (spiking activity, Extended Figure 1a-c) from populations of single striatal neurons during task performance (Figure 2a, Extended Figure 2a,e,i). We observed that striatal neurons displayed diverse firing patterns, with different units firing at different times within the interval period (Figure 2b-d). Can such firing patterns support duration judgments? To determine whether and the degree to which individual neurons could contribute to duration judgments, for each trial, we counted spikes in the last 500 ms of the interval period and compared spike count distributions of short vs long stimulus trials using a receiver operating characteristic

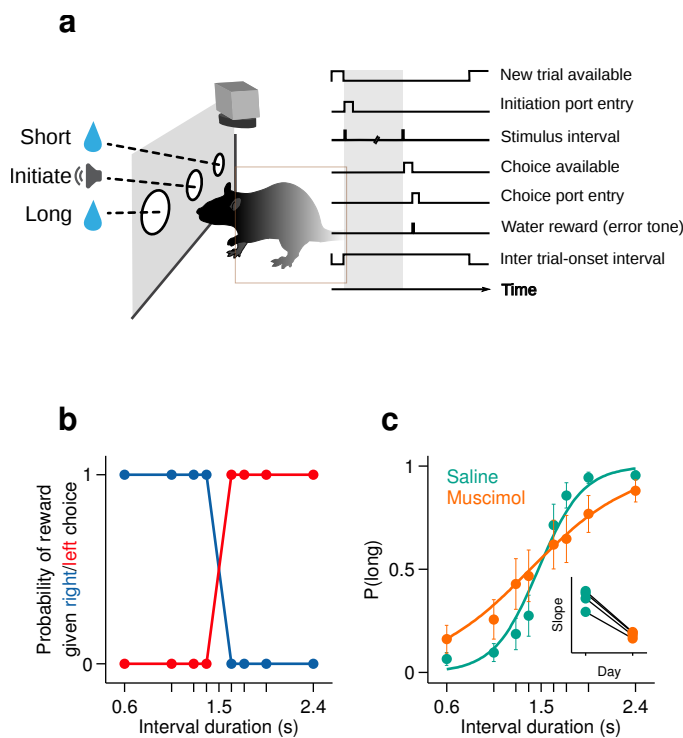

**Figure 1. Rats judged interval durations as either long or short.** (a) Rats triggered interval stimuli (i.e. two brief auditory tones separated by a silent interval of random duration) by inserting their snout into a central port. Following interval offset, animals reported their long vs short judgment at two lateral choice ports. Correct trials yielded a water reward, while incorrect or premature responses produced a white noise sound and a time out. Top view, high-speed video was acquired throughout task performance. (b) Reward contingency. (c) Averaged psychometric curves following bilateral muscimol or saline injections in dorsal striatum (mean  $\pm$  standard deviation across sessions and logistic fit;  $n = 2$  rats, 4 sessions each). Inset: slope of psychometric curves on consecutive saline and muscimol sessions.

(ROC) analysis (see Methods). We found that the majority of neurons ( $\sim 57\%$ ) preferred either short or long stimuli (Figure 2e, Extended Figure 2b,f,j; short-preferring:  $n = 159/433$ , 36.7%; long-preferring:  $n = 87/433$ , 20.1%; permutation test,  $p < 0.05$ ). As expected, short-preferring neurons displayed higher firing on average prior to the 1.5 s category boundary, after which long-preferring neurons displayed higher firing (Figure 2f). These averaged activity patterns resemble the likelihood of receiving reward on moment-by-moment basis should the animal choose short or long (compare with reward contingency in Figure 1b). Such signals, previously observed in the parietal cortex of monkeys performing a similar timing task<sup>5</sup> and in the striatum in a value based decision task<sup>15</sup>, are potentially useful for guiding choice. However, were animals' judgments indeed guided by such signals, it should be possible to predict choices reported later in the trial using neural activity collected during interval stimuli. Indeed, in trials wherein a near boundary interval was judged as long, firing of the short (long) preferring subpopulation dropped (rose) faster, so that the two curves crossed before the 1.5 s boundary (Figure 2g, Extended Figure 2c,g,k). Conversely, in trials wherein the same interval was judged as short, the two curves evolved more slowly so that at the time of interval offset the short preferring subpopulation was still firing at a higher level and a crossing point had not yet been reached (Figure 2h, Extended Figure 2d,h,l).

The observation of large proportions of short- and long-preferring neurons whose dynamics predicted choice is evidence that duration judgments are guided by the state of striatal populations. Might the information afforded by ensembles of striatal neurons account for the pattern of subjects' judgments across all stimuli? To test this hypothesis, we compared session to session fluctuations in behavioral performance with the separability of activity states of simultaneously recorded ensembles at the offset of short as compared to long intervals. Briefly, for each trial in a session we characterized neural population state as a vector  $\mathbf{r} = (r_1, r_2, \dots, r_n)$ , where  $r_n$  is the number of spikes fired by neuron  $n$  within the last 500 ms of the interval period. Next, for each session we found the

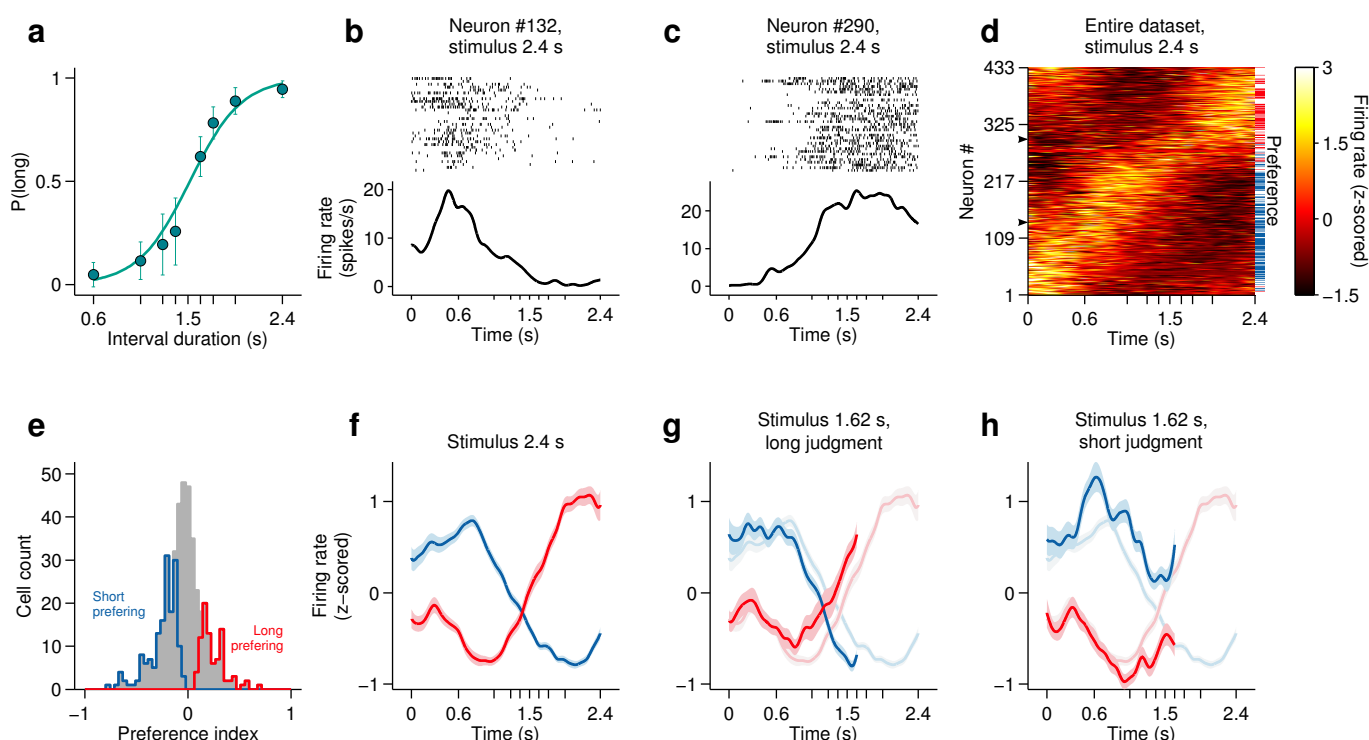

**Figure 2. Dynamics of striatal subpopulations predict duration judgments.** (a) Psychometric function for neural recording sessions (mean±standard deviation across sessions and logistic fit,  $n = 37$  sessions from 3 rats). (b,c) Raster plot and peri-stimulus time histogram (PSTH) of two example cells for trials in which the longest stimulus interval (2.4 s) was presented. Time = 0 corresponds to stimulus onset. (d) Normalized PSTHs of all neurons in the dataset for trials in which the longest stimulus interval was presented. Arrowheads indicate cells shown in (b,c). Blue and red ticks indicate cells with significant short and long preferences, respectively. (e) Histogram of preference indices. Blue and red outlines indicate subpopulations with significant short and long preferences, respectively. (f) Averaged, normalized PSTH of the two subpopulations outlined in (e) for trials in which the longest stimulus interval was presented (mean±SEM). (g) Same as in (f), for trials in which a near-boundary stimulus interval (1.62 s) was judged as long. For comparison, curves shown in (f) are reproduced as a watermark. (h) same as (g) for trials in which the stimulus was judged as short.

linear discriminant that best separated population state vectors according to whether they came from a long or a short interval trial (Figure 3a; see Methods). A threshold placed along the linear discriminant was then used as a decision rule (black line in Figure 3a) to generate a ‘neural duration judgment’ for each trial. This procedure allowed us to obtain, for each session, a quantitative description of how well simultaneously recorded neurons could categorize stimuli, i.e., a neurometric function comparable to the behavioral psychometric function (Figure 3b). Consistent with duration information being encoded at the population level, we found that for sessions in which greater numbers of neurons were recorded simultaneously (i.e. upper tercile of sessions with regard to population size) psychometric and neurometric performances were similar and strongly correlated ( $r^2 = 0.76$ ,  $p < 0.001$ ; Figure 3c). These results demonstrate that a read out of stimulus category from even modestly-sized ensembles of striatal neurons was in many cases sufficient to explain the pattern of duration judgments produced by behaving subjects.

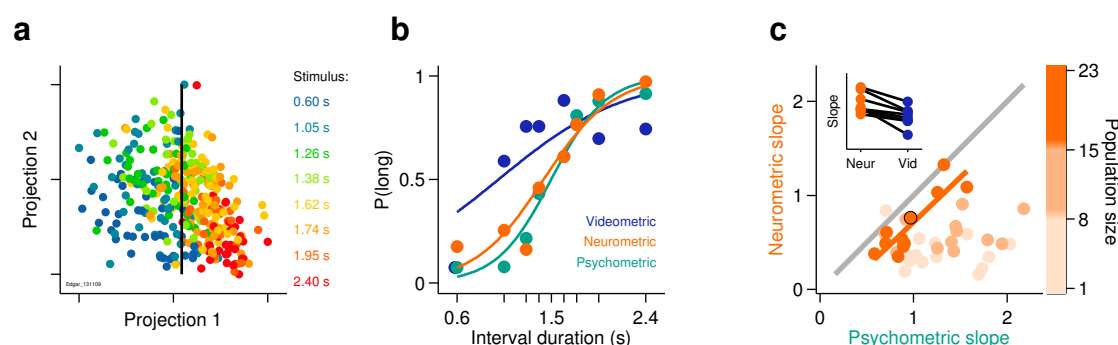

**Figure 3. Simultaneously recorded population state at interval offset can explain behavioral performance.** (a) Low dimensional representation of population state at interval offset for one example session. Black line is the decision rule (see text). (b) Example psychometric, neurometric and videometric curves for the same session as in (a). (c) Slopes of psychometric and neurometric curves for all sessions. Color indicates terciles of population size. Highlighted data point corresponds to the session in (a-b). Inset: regression slope of neurometric and videometric curves for sessions in the upper tercile.

It has been previously reported<sup>18</sup> that duration judgments could be predicted by animals' ongoing behavior during the interval period. In addition, it is well known that striatal neurons can fire around movements<sup>19</sup>. Could the categorization performance of striatal ensembles reflect activity related to movements the animal might be making during the task? To test to what degree ongoing behavior could explain the categorization performance of striatal neural activity, we applied an analogous classification analysis to video images taken of the animal just before interval offset (see Methods). We found that our ability to categorize intervals using video frames was consistently poorer as compared to neural data collected at the analogous time periods during the task (Figure 3b, inset in Figure 3c, Extended Figure 3a). In contrast, we were able to categorize stimuli as well as the animal using video frames taken at the point when animals expressed their choice at one of the reward ports (Extended Figure 3b). Furthermore, movement related responses in the striatum are known to occur both pre- and post-movement onset, much later than in other motor areas such as pre-motor and motor cortex<sup>20</sup>. Thus, if purely movement-related activity were responsible for the categorization performance of striatal ensembles, we would expect ensemble performance to display a similar time course to that of video frames. Applying the same analyses at multiple points in time ranging from 500 ms preceding to 500 ms following stimulus offset revealed a strikingly different profile of categorization performance for video frames as compared to neural ensembles (Extended Figure 4). Specifically, the time course of duration categorization by neural ensembles was best correlated with the duration categorization by video frames when using spikes collected between 400 ms and 200 ms preceding a reference video frame. These data strongly suggest that the categorization performance of striatal neurons was not simply related to the immediate sensorimotor state of the animal, and instead likely reflects that striatal neurons encode an internal neural representation of the state of animals' categorical decisions and not a signal that is already on a final path to the muscles.

We have shown thus far that categorical information about interval duration contained in the firing of striatal populations can explain the precision of animals' judgments about duration.

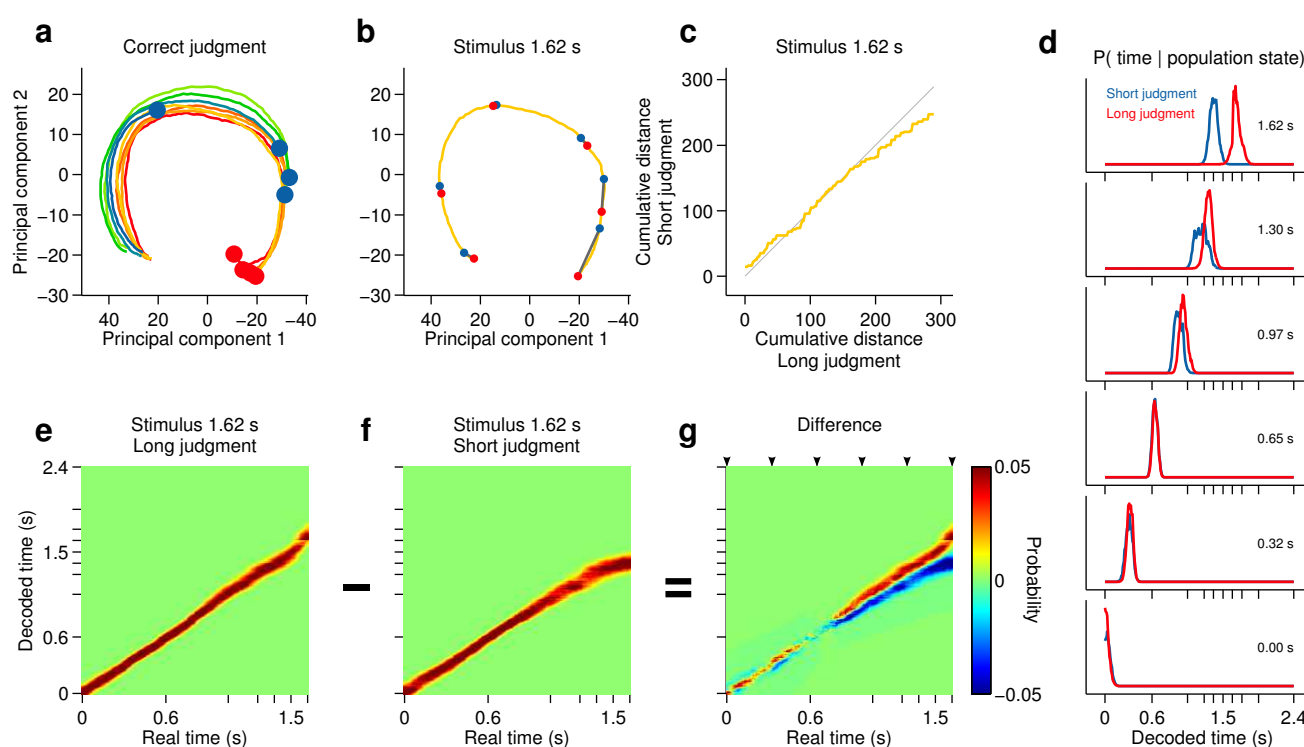

**Figure 4. Smoothly changing population state encodes elapsing time in accordance with perceptual report for a long stimulus.** (a) Low dimensional representation of population state during entire interval period of correct trials. Line colors indicate interval duration (warmer colors are longer intervals, as in Figure 3). Dots are placed at the interval offset end, and their color indicates judgment (blue: short; red: long). (b-g) Population state and decoded time for a single long, near boundary stimulus interval (1.62 s). (b) Yellow curve is same as in (a). Red dots are 6 time points evenly spaced between interval onset and offset. Blue dots are projections of population state during short judgment trials. Grey lines link population states at equivalent time points. (c) Average cumulative distance travelled in full neural space along trajectory represented in (b) on long versus short judgment trials. (d) Posterior probability of time given population state at the time points indicated in (b), averaged within trials of each judgment type. (e,f) Same as (d) for the entire interval period. (g) Difference between posteriors for long and short judgment trials. Arrowheads indicate same time points used in (b,d).

However, in the task employed here, categorical judgments must be derived from a continuously evolving decision variable that represents how much time has elapsed since the onset of the stimulus. As suggested by the diversity of firing patterns (Figure 2d), the state of population activity evolved continuously during interval stimuli (Figure 4a, Extended Figure 5a,e,i, Extended Figure 6a,e,i), a feature not captured by binary classification. Such a pattern of population activity has been proposed as a suitable neural code for elapsing time<sup>16-17</sup>. However, if such a representation underlies subjects' duration judgments in this task, neural activity should continuously traverse a non-repeating trajectory in state space in a manner that predicts duration judgments. Indeed, even in a low dimensional projection of population activity, we found that network state ran ahead or behind depending on whether the animal judged a near boundary stimulus as long or short (Figure 4b-c, Extended Figure 5b-c,f,g,j-k, Extended Figure 6b-c,f,g,j-k). The correspondence between population trajectory and duration judgments suggests that striatal dynamics may form an internal



representation of elapsed time that informed categorical decisions about duration. To directly test this hypothesis, we decoded time from the population using a naive bayes decoder. We found that decoded estimates of time ran faster or slower when animals judged a given stimulus as long or short, respectively (Figure 4d-g; Extended Figure 5d,h,i; Extended Figure 6d,h,i; cross validated Naive Bayes decoder; see Methods). This indicates that striatal activity provides information not only about categorical judgments of interval duration, but also about elapsing time, the continuously varying decision variable necessary to inform those judgments.

If the striatal activity we describe above directly supports task performance, manipulating the striatum should modify duration judgments. To test whether the striatum was necessary for duration judgments, we bilaterally injected the GABA<sub>A</sub> receptor agonist muscimol (Extended Figure 1d). As a result, the duration sensitivity of animals' judgments dropped significantly as compared to interleaved saline control sessions (Figure 1c; psychometric slope on saline sessions = [1.53 2.04] vs on muscimol sessions = [0.43 0.77]; 95% confidence intervals), yet animals otherwise performed normally. These results, by demonstrating that duration categorization in this task was dependent on a normally functioning striatum, suggest that the neural signals we observed directly supported duration judgments.

Attempts to understand the neural mechanisms of time estimation have begun to focus on continuously evolving population dynamics as a general mechanism for time encoding across the brain<sup>6-7,16-17,21</sup>. According to this view, time may be encoded by any reproducible pattern of activity across a population of neurons for as long as the pattern is continuously changing and non-repeating. However, no study to date has directly compared the speed of such "population clocks" with the duration judgments of the behaving subjects in which they are found. We show that as rats judged the duration of interval stimuli, striatal neurons displayed dynamics in firing rate that contained information about elapsed time. Furthermore, this information was sufficient to account for the animals' perceptual decisions, and was not accompanied by systematic differences in outwardly expressed behavior over time. Combined with the observation that striatal inactivation caused a specific decrement in timing performance, these data suggest that striatal dynamics form a central neural representation of time that guides animals' decisions about duration. Such a coding mechanism in the striatum is well situated to inform the appropriate selection of actions through downstream circuitry involving the globus pallidus, substantia nigra, and various extrinsic connections between the basal ganglia and brainstem, thalamic, and cortical motor areas<sup>22</sup>. However, the coding properties tested here could be generally tested in other brain areas where timing signals have been identified such as the hippocampus<sup>6,25</sup>, medial prefrontal<sup>8-9</sup>, parietal<sup>5,23</sup> and motor<sup>24</sup> cortices, and the cerebellum<sup>7</sup>, among others. Such an approach promises to elucidate where and how time information is used by the brain to support the myriad time-dependent functions we and other organisms rely on for survival.

# References

1. Mello, G., Soares, S., and Paton, J.J. (2015). A scalable population code for time in the striatum. *Current Biology*. *In press*.
2. Matell, M.S., Meck, W.H., and Nicolelis, M.A.L. (2003). Interval timing and the encoding of signal duration by ensembles of cortical and striatal neurons. *Behavioral Neuroscience* 117, 760-773.
3. Jin, D.Z., Fujii, N., and Graybiel, A.M. (2009). Neural representation of time in cortico-basal ganglia circuits. *Proceedings of the National Academy of Sciences* 106, 19156-19161.
4. Adler, A., Katabi, S., Finkes, I., Israel, Z., Prut, Y., and Bergman, H. (2012). Temporal convergence of dynamic cell assemblies in the striato-pallidal network. *The Journal of Neuroscience* 32, 2473-2484.
5. Leon, M.I., and Shadlen, M.N. (2003). Representation of time by neurons in the posterior parietal cortex of the macaque. *Neuron* 38, 317-327.
6. MacDonald, C.J., Lepage, K.Q., Eden, U.T., and Eichenbaum, H. (2011). Hippocampal "time cells" bridge the gap in memory for discontinuous events. *Neuron* 71, 737-749.
7. Mauk, M.D., and Buonomano, D.V. (2004). The neural basis of temporal processing. *Annu. Rev. Neurosci.* 27, 307-340.
8. Kim, J., Ghim, J.-W., Lee, J.H., and Jung, M.W. (2013). Neural correlates of interval timing in rodent prefrontal cortex. *The Journal of Neuroscience* 33, 13834-13847.
9. Xu, M., Zhang, S.-y., Dan, Y., and Poo, M.-m. (2014). Representation of interval timing by temporally scalable firing patterns in rat prefrontal cortex. *Proceedings of the National Academy of Sciences* 111, 480-485.
10. Hinton, S.C., and Meck, W.H. (2004). Frontal-striatal circuitry activated by human peak-interval timing in the supra-seconds range. *Cognitive Brain Research* 21, 171-182.
11. Harrington, D.L., Zimbelman, J.L., Hinton, S.C., and Rao, S.M. (2009). Neural modulation of temporal encoding, maintenance, and decision processes. *Cerebral Cortex*, bhp194.
12. Wencil, E.B., Coslett, H.B., Aguirre, G.K., and Chatterjee, A. (2010). Carving the clock at its component joints: neural bases for interval timing. *Journal of neurophysiology* 104, 160-168.
13. Malapani, C., Rakitin, B., Levy, R., Meck, W., Deweer, B., Dubois, B., and Gibbon, J. (1998). Coupled temporal memories in Parkinson's disease: a dopamine-related dysfunction. *Cognitive Neuroscience, Journal of* 10, 316-331.
14. Meck, W.H. (2006). Neuroanatomical localization of an internal clock: a functional link between mesolimbic, nigrostriatal, and mesocortical dopaminergic systems. *Brain Research* 1109, 93-107.
15. Lau, B., and Glimcher, P.W. (2008). Value representations in the primate striatum during matching behavior. *Neuron* 58, 451-463.
16. Buonomano, D.V., and Merzenich, M.M. (1995). Temporal information transformed into a spatial code by a neural network with realistic properties. *Science* 267, 1028-1030.
17. Buonomano, D. V. in *Neurobiol. Interval Timing* (Merchant, H. & de Lafuente, V.) 101–117 (Springer, 2014).
18. Gouvea, T.S., Monteiro, T., Soares, S., Atallah, B.V., and Paton, J.J. (2014). Ongoing behavior predicts perceptual report of interval duration. *Frontiers in Neurobotics* 8.
19. Jin, X., and Costa, R.M. (2010). Start/stop signals emerge in nigrostriatal circuits during sequence learning. *Nature* 466, 457-462.
20. Alexander, G.E., and Crutcher, M.D. (1990). Neural representations of the target (goal) of visually guided arm movements in three motor areas of the monkey. *Journal of Neurophysiology* 64, 164-178.
21. Gershman, S.J., Moustafa, A.A., and Ludvig, E.A. (2013). Time representation in reinforcement learning models of the basal ganglia. *Frontiers in computational neuroscience* 7.
22. Steiner, H., and Tseng, K.Y. (2010). *Handbook of Basal Ganglia Structure and Function: A Decade of Progress*, (Elsevier Science).
23. Janssen, P., and Shadlen, M. N. (2005). A representation of the hazard rate of elapsed time in macaque area LIP. *Nature neuroscience*, 8(2), 234-241.
24. Lebedev, M. A., O'doherty, J. E., and Nicolelis, M. A. L. (2008). Decoding of temporal intervals from cortical ensemble activity. *Journal of Neurophysiology*, 99(1), 166-186.
25. Pastalkova, E., Itskov, V., Amarasingham, A., and Buzsáki, G. (2008). Internally generated cell assembly sequences in the rat hippocampus. *Science*, 321(5894), 1322-1327.



# Methods

**Subjects.** Five male Long-Evans hooded rats (*Rattus norvegicus*) between the ages of 6 and 24 months were used for this study. Three rats were used for neural recordings and two rats for pharmacological manipulations. All experiments were in accordance with the European Union Directive 86/609/EEC and approved by the Portuguese Veterinary General Board (Direcção-Geral de Veterinária, project approval 014303 - 0420/000/000/2011).

**Behavior.** Rats were trained to perform a two-alternative forced choice timing task<sup>18</sup>. Briefly, animals had to categorize time intervals as either long or short by making left/right choices. For each session the animals were placed in a custom made behavioral box containing 3 nose ports and a speaker. Each trial was self-initiated by entry into the central nose port and was followed by a pair of brief auditory tones (square pulses at 7,500 Hz, 150 ms) separated by an interval selected randomly out of 8 possible durations (0.6, 1.05, 1.26, 1.38, 1.62, 1.74, 1.95 and 2.4 s). Judgments were reported at two laterally located nose ports. Left responses were reinforced with a drop of water (solenoid valves, Lee Company) after intervals longer than 1.5 seconds, and right responses otherwise. Incorrect responses were punished with a brief white noise burst (150 ms) and a time out. High speed video (120 fps) was collected from above during task performance. Psychometric functions were fitted using two-parameter logistic regressions.

**Electrophysiology.** Rats were implanted with 32-channel tungsten microwire moveable array bundles (Supplementary Figure 1a, Innovative Neurophysiology) under isoflurane anaesthesia. All recordings targeted dorsal striatum with coordinates centred at +0.2mm AP and  $\pm 3$  mm ML (rat Bertrand), and +0.84mm AP and  $\pm 2.5$ mm ML (rats Edgar and Fernando), from Bregma. Rats were given a week of post-surgical recovery and array placements were confirmed with histology (Supplementary Figure 1c). Neural signals were recorded at 30 kHz during behavior, amplified and band-pass filtered at 250-750 Hz (Cerebus - Blackrock Microsystems). Each independent bundle was moved 50-100  $\mu$ m after every recording session to ensure that independent neural populations were sampled across recording sessions. Waveforms corresponding to action potentials from single neurons were sorted offline using principal component analysis (PCA) (offline sorter, Plexon). All remaining analysis were run in custom Matlab (Mathworks) software. We selected all isolated units with a mean session firing rate  $>0.5$  Hz and from sessions with  $>70\%$  correct performance (averaged across all stimuli) and a minimum of 250 trials ( $n=433$  cells, 37 recording sessions, 3 animals). To build PSTHs, spikes were counted in 2-ms bins and convolved with a gaussian kernel with 25-bin standard deviation. PSTHs in Figure 2d were ordered by angular position in the space formed by the first 2 principal components describing firing dynamics (i.e. dimensions are all time bins within interval period, samples are each neuron's mean PSTH). This method<sup>26</sup> orders cells with respect to their dynamics while taking into consideration the full response profile over the relevant temporal window, and not just a single response feature such as peak response time.

**Pharmacology.** We implanted 3-mm 20-gauge stainless steel guide cannulas (Belany) bilaterally into the striatum of 2 rats [+0.84mm anterior-posterior (AP),  $\pm 2.5$ mm medial-lateral (ML), from Bregma, and -3mm dorsal-ventral (DV, from cortex surface) under isoflurane anesthesia. After one week of post-surgical recovery and 4 days of training, rats were injected with either vehicle (saline, PBS 1x) or muscimol (GABA-A agonist, 20 mg/L, Sigma<sup>TM</sup>) solutions in alternate days. Two 1- $\mu$ L syringes (Hamilton), attached to an injection pump (Harvard Apparatus) through 20-gauge internal

cannulas that extended 1.5 mm below the guide cannulas, injected 0.6  $\mu$ L of solution per site during 2.5 min. The internal cannulas were left in place for an additional 1.5 min and the rats were given a 45-min recovery period in their home-cage before starting the task. Cannula placements were confirmed by histology (Supplementary Figure 1d).

**Preference index.** We counted spikes during the last 500 ms of the stimulus period, and built two separate spike count distributions for short and long judgment trials. Next, we used a ROC analysis to measure the separation between distributions (95% bootstrap confidence interval, 1000 iterations). We then transformed the area under the ROC curve ( $\text{auROC} = [0,1]$ ) into a preference index ( $\text{pi} = 2 \cdot \text{auROC} - 1$ ;  $\text{pi} = [-1,1]$ ). We adopted the convention that neurons with positive preference indices fired preferentially for long stimuli (Figure 2e, Extended Figure 2b,f,j).

**Low dimensional representations of population state.** We refer to the vector describing instantaneous firing rates (measured within an integration window) across a population of neurons as the population state. The population state vector is a high dimensional variable (i.e. it has as many dimensions as neurons). With the purpose of visualizing population state in 2d plots, we employed standard dimensionality reduction techniques. In Figure 3a, we chose to represent in the abscissa a direction that emphasizes the separability between short and long stimulus trials (i.e. the direction that maximizes variance between groups while minimizing variance within groups; Fisher's linear discriminant; see below), and in the ordinate the axis of maximal variance that is also orthogonal to the abscissa (i.e. first principal component calculated in the null space of the linear discriminant). In Figure 4a-b and corresponding panels in Extended Figure 5, population state is represented in the space formed by the first 2 principal components describing population state, calculated during presentation of interval the interval for which choice variance is maximal (i.e. dimensions are neurons, samples are averaged spike counts for the time bins within that interval).

**Neurometric curves.** For each trial in a session we characterized neural population state as a vector  $\mathbf{r} = (r_1, r_2, \dots, r_n)$ , where  $r_n$  is the number of spikes fired by neuron  $n$  within the last 500 ms of the interval period in that trial. Next, for a subset of trials from each session (*training set*; 20-fold cross validation), we found the linear discriminant that best separated population state vectors according to whether they came from long or short interval trials (Fisher's linear discriminant analysis, LDA). A threshold placed along the linear discriminant was then used as a decision rule applied to neural data from the remaining trials (*test set*). Figure 3a depicts population vectors from an example session (projection 1: linear discriminant; projection 2: first principal component of the orthogonal subspace; black line: decision rule). We iterated over this procedure until all trials had been tested, thus obtaining for each trial a 'neural duration judgment'. In analogy with behavioral judgments, we used two parameter logistic fits to obtain a quantitative description of the performance of simultaneously recorded neurons in categorizing stimuli - the neurometric function (Figure 3b, orange curve).

**Videometric curves.** Full session videos (256x192 pixels resolution) were cut into 3-s long clips with Bonsai<sup>27</sup>. Individual frames from approximately 75 ms before interval offset were used for this analysis. This buffer was added to ensure that all frames used preceded stimulus offset. Images were first represented as vectors composed of individual pixel luminance values. Given that image sequences tend to lie on curved low dimensional manifolds in pixel space<sup>28</sup>, any slight differences in behavioral state reflected in images collected at the offset of short and long interval categories

are not necessarily expected to be linearly separable. Thus, we employed isomap<sup>29</sup>, a non-linear dimensionality reduction method, to obtain an information rich yet low dimensional representation of animals' ongoing behavior. This approach has the advantage over tracking methods that it does not make assumptions as to what part of the animals' movements might provide information about stimulus category. The neighborhood size, used to compute the shortest paths between data points, was set to 25 frames to minimize, on average, the dimensionality at which the reconstruction error elbow occurred. In analogy with the neurometric curves, for each stimulus type, we then trained a linear discriminant (leave-one-out cross-validation procedure) to classify frames into those that were recorded during trials where a 'short' or 'long' stimulus interval was presented. The classification was performed in the reduced space determined by isomap. As a positive control for the method, we repeated the same analysis for frames captured at the moment animals expressed their judgment by inserting their snout at one of the two choice ports. Here, the neighborhood size was chosen to be the minimum for which all frames (from a single session) could be included in a single embedding. This analysis was done for all usable videos (8 out of 11) of sessions in the upper tercile with regard to population size.

**Time course of classification performance from neural and video data.** To compare how the decoding performance using neural and video data evolved over time, the classification analyses described in Neurometric curves and Videometric curves was performed every 100 ms within a one second window centered around stimulus offset. Video frames at the each time point and neural data in a 200 ms time bin terminating at each time point were used for the analysis. This generated neural and video classification curves that described the ability of simultaneously recorded neural ensembles and video frames to correctly classify interval stimuli as long or short (Extended Figure 4a-h). To determine the relative timing of classification ability in neural ensembles and behavior, we regressed the neural classification curve against the video classification curve for shifts ranging from -300 ms to 300 ms in 100 ms steps (Extended Figure 4i).

**Population decoder.** We decoded elapsed time from striatal activity using a cross validated, flat prior naive Bayes decoder. First, spikes were counted in 500-ms wide, 10-ms apart overlapping time bins (time referring to the right edge of the bin). For each neuron, we captured cross-trial variability in spike counts at each time bin by building empirical distributions. We did it by computing, for each neuron and time bin, a weighted histogram of spike counts across all correct trials. We defined the weight applied to the spike count observed at a given trial as the choice variance associated with the stimulus presented in that trial. Specifically, weights were defined for each stimulus value  $s$  as the product of the probabilities of long and short judgments, i.e.,  $P(\text{long judgment} \mid \text{stimulus} = s) * P(\text{short judgment} \mid \text{stimulus} = s)$ . Histograms were then smoothed using local linear regression (lowess), and normalized to unit area. As a result, near boundary trials had a greater contribution to the final shape of the histograms. Iterating this procedure over all time bins within the interval period produced the conditional probability distribution  $P(r_n \mid \text{time})$ , a.k.a. likelihood function. Whenever appropriate (i.e. when decoding from correct trials), leave-one-out cross validation was performed by recomputing the likelihood function with all correct trials but the one being decoded from. Populations of neurons were built by concatenating together trials of same stimulus and judgment type. For each of 100 such trials, posteriors were computed for each neuron with a flat prior, then multiplied across neurons and renormalized to unit area to generate the population posterior.

# Additional References

26. Geffen, M. N., Broome, B. M., Laurent, G. and Meister, M. (2009). Neural encoding of rapidly fluctuating odors. *Neuron* 61, 570–586.
27. Lopes et al. (2015). Bonsai: An event-based framework for processing and controlling data streams. *Frontiers in Neuroinformatics*.
28. Pless, Robert. "Image Spaces and Video Trajectories: Using Isomap to Explore Video Sequences." *ICCV*. Vol. 3.
29. Tenenbaum, J.B., De Silva, V., and Langford, J.C. (2000). A global geometric framework for nonlinear dimensionality reduction. *Science* 290, 2319-2323.

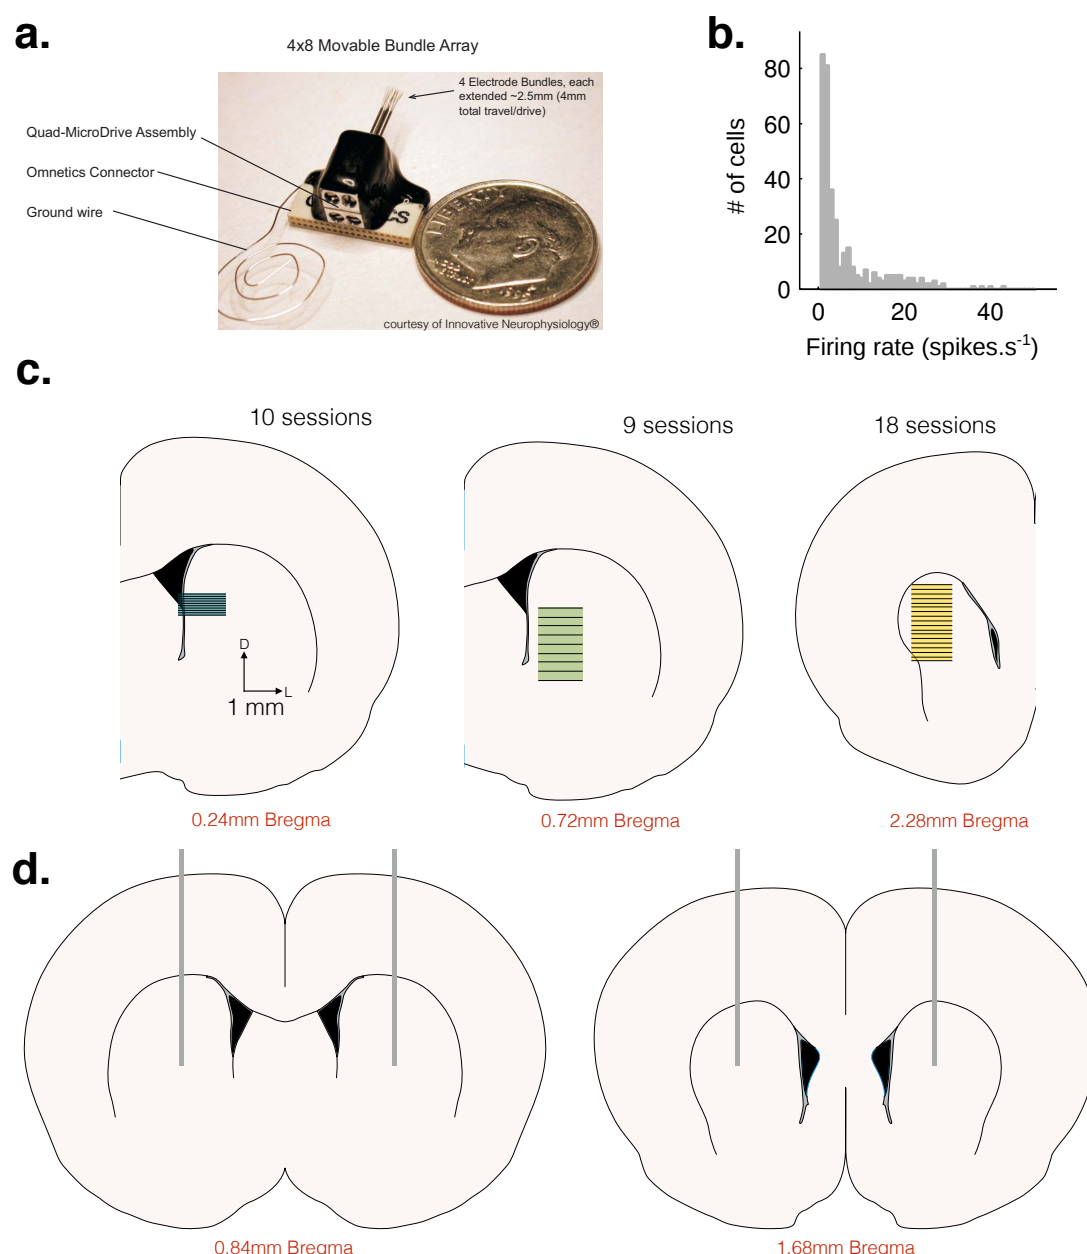

**Extended Figure 1.** (a) Movable microwire bundle array (Innovative Neurophysiology) used for all neural recordings. (b) Histogram of firing rates for all selected cells (bin size 1 spike/s). (c) Schematic representation of the striatal recording sites. Coronal slices at intermediate AP positions are shown for reference (left to right, rats Bertrand, Edgar and Fernando). Colored rectangles show the approximate DV position of the wire bundles across recording sessions and horizontal black lines represent session-by-session recording sites, for 10, 9 and 18 recording sessions, respectively. (d) Schematic representation of the location of saline and muscimol injections. Coronal slices at intermediate anterior posterior (AP) positions are shown for reference at +0.84 mm (left, rat Albert) and +1.68mm (right, rat Yuri) from Bregma. Vertical grey lines represent the location of the internal cannulas and show the approximate dorsal-ventral (DV) position of the injection sites.

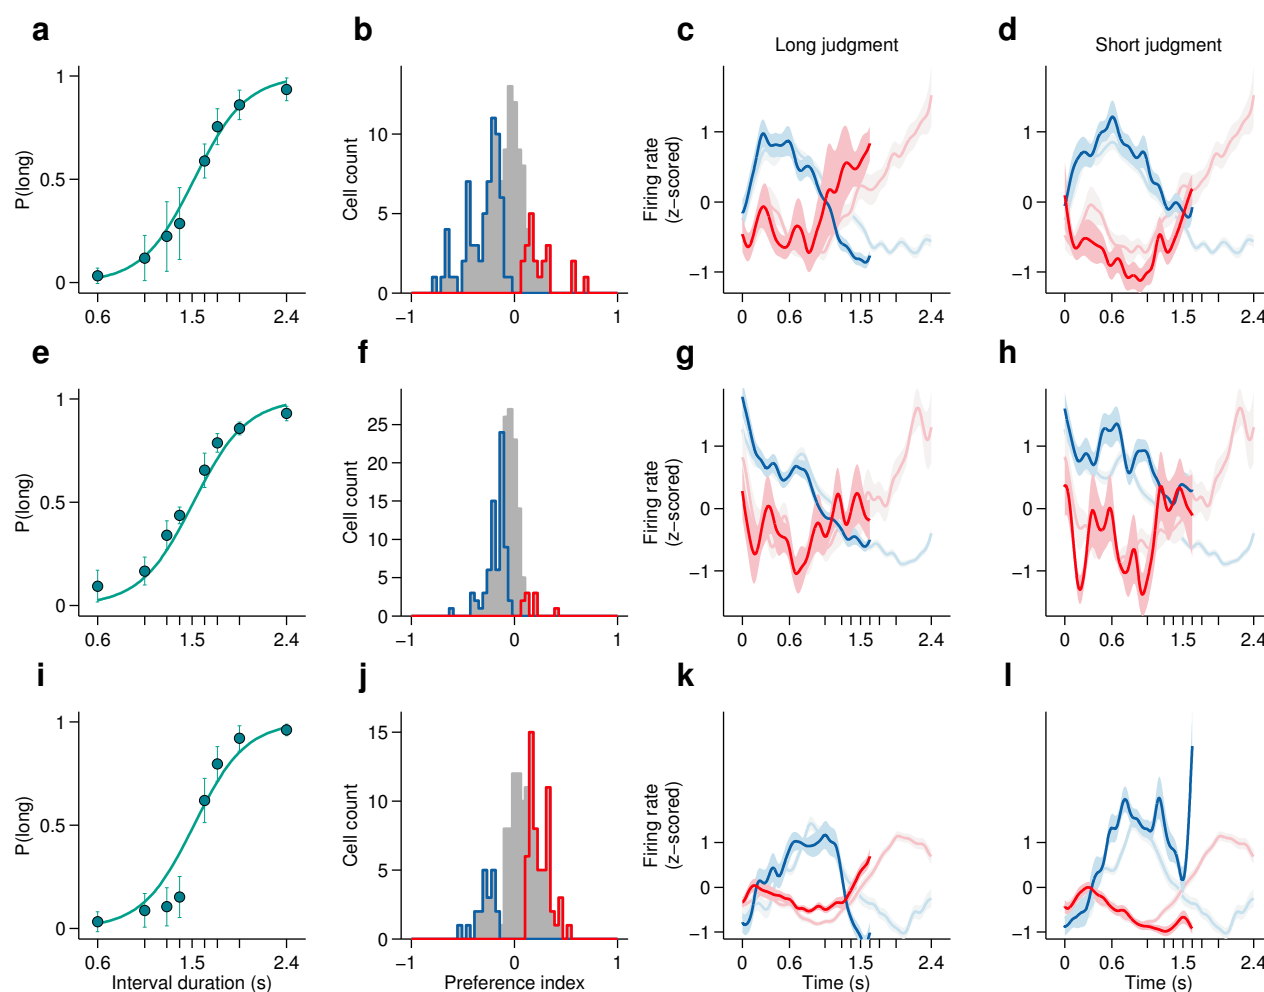

**Extended Figure 2. Dynamics of striatal subpopulations predict duration judgments. (a,e,i)** Psychometric functions for the recording sessions of rats Bertrand (a), Edgar (e) and Fernando (i) (mean $\pm$ standard deviation across sessions and logistic fit). **(b,f,j)** Histograms of preference indices for the same individual animals. Blue and red outlines indicate subpopulations with significant short and long preferences, respectively. **(c,g,k)** Averaged, normalized PSTHs of the two subpopulations outlined in (b,f,j) for trials in which the a near-boundary stimulus interval (1.62 s) was judged as long (mean $\pm$ SEM). **(d,h,l)** same as in (c,g,k) for short judgment trials.



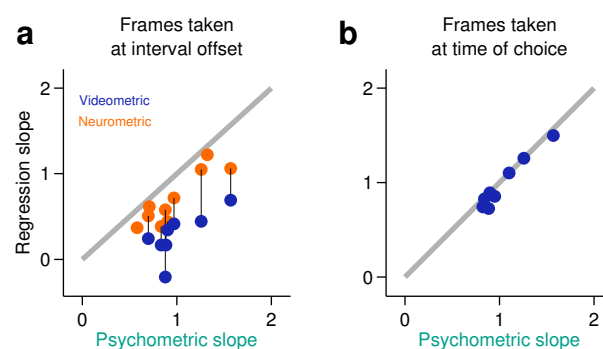

**Extended Figure 3. Behavior at the end of the neural analysis window did not explain the categorization performance of neural populations. (a)** Neurometric (orange data points) or videometric (purple data points) logistic slope plotted against the psychometric slope for each session in the upper tercile with respect to simultaneously recorded population size. **(b)** Videometric slope plotted against the psychometric slope where the videometric curve was built using image frames taken at the time that animals expressed their choice.

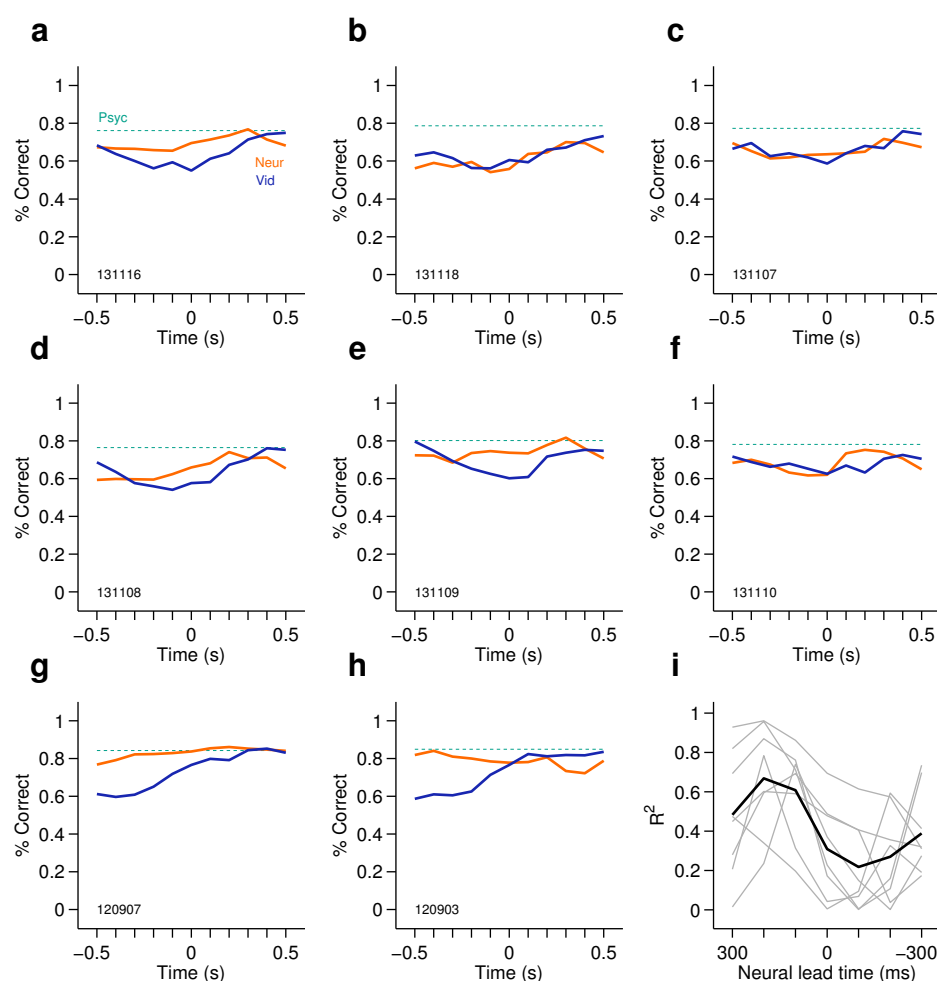

**Extended Figure 4. Information about stimulus category contained in neural activity cannot be explained by immediate sensorimotor state. (a-h)** Performance of an ideal observer analysis in predicting stimulus category, applied to neural (orange) and video (blue) data obtained at different times relative to interval offset. Panels are sessions in the upper tercile with regard to population size. Dashed line is the behavior performance. **(i)** The orange and blue curves were regressed against each other at different time shifts. The regression  $R^2$  values for each session are shown in thin grey lines. The average over all sessions is shown in black.

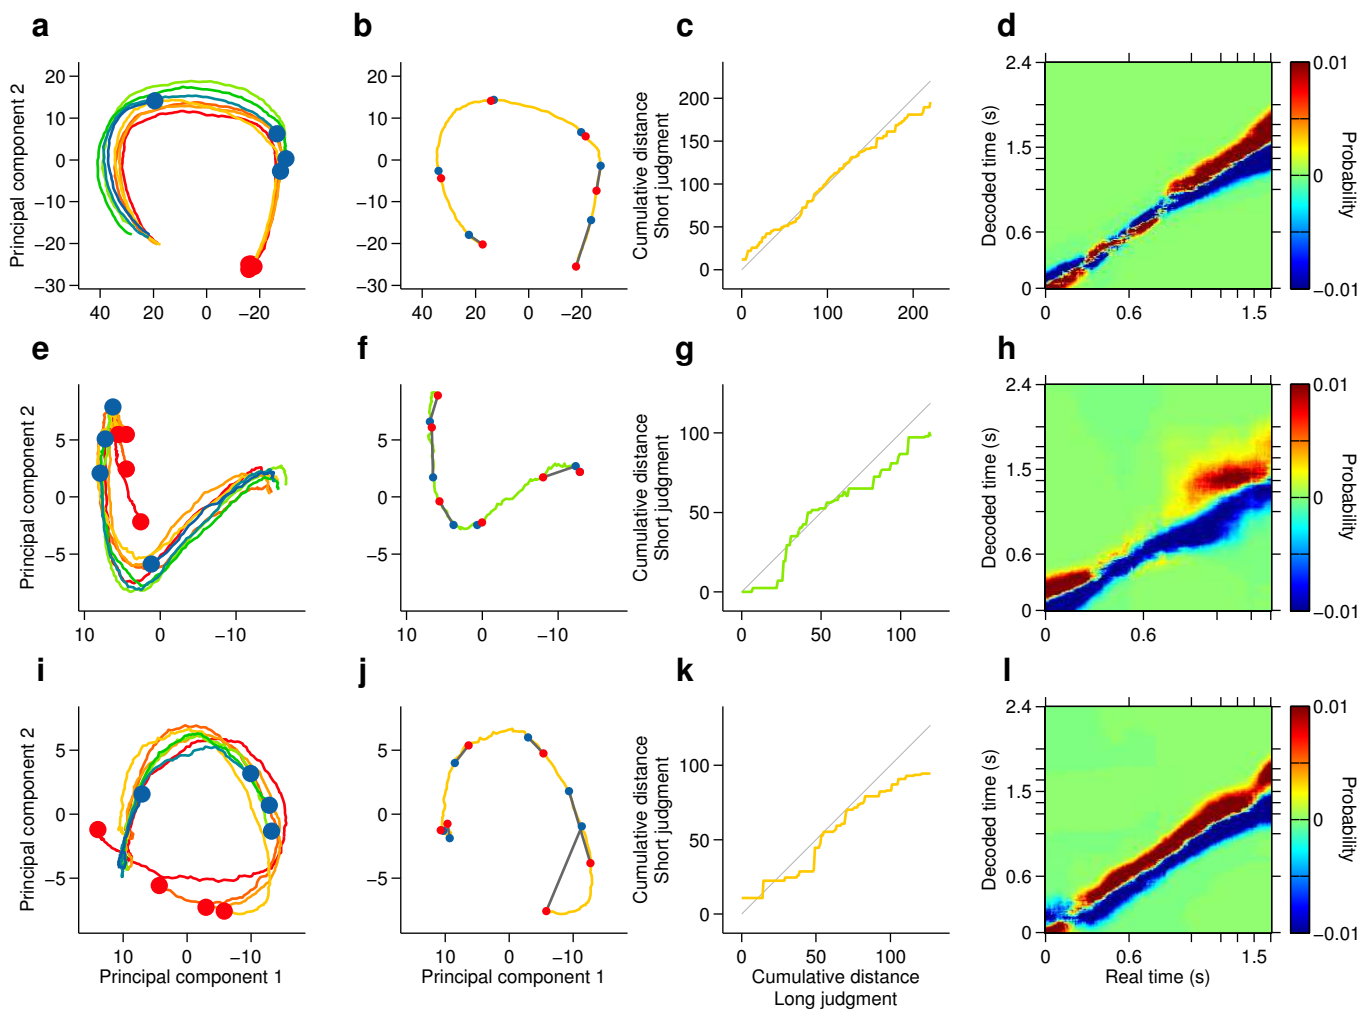

**Extended Figure 5. Single subjects show smoothly changing population states that encode elapsing time in accordance with perceptual report.** (a,e,i) Low dimensional representation of population state during entire interval period of correct trials of rats Bertrand (a), Edgar (e) and Fernando (i). Line colors indicate interval duration (warmer colors are longer intervals, as in Figures 3 and 4). Dots are placed at the interval offset end, and their color indicate choice (blue: short; red: long). (b,f,j) Yellow/green line is same as in (a,e,i) for a single near boundary stimulus interval (1.62/1.38 s; stimulus of highest choice variance for each subject). Red dots are 6 time points evenly spaced between interval onset and offset. Blue dots are projections of population state during short judgment trials. Grey lines link population states at equivalent time points. (c,g,k) Average cumulative distance travelled in full neural space along trajectory represented in (b,f,j) on long versus short judgment trials. (d,h,l) Difference between posteriors for long and short judgment trials for rats Bertrand (d), Edgar (h) and Fernando (l).

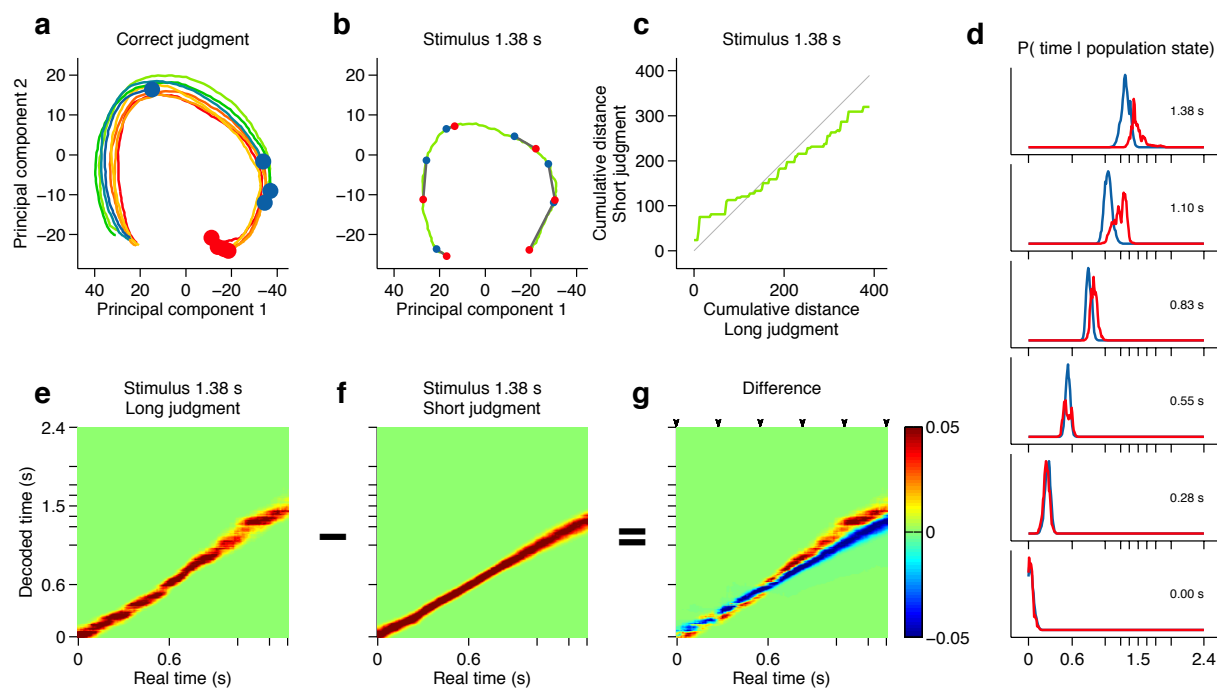

**Extended Figure 6. Smoothly changing population state encodes elapsing time in accordance with perceptual report for a short stimulus.** (a) Low dimensional representation of population state during entire interval period of correct trials. Line colors indicate interval duration (same color code as in Figure 3 and 4). Dots are placed at the interval offset end, and their color indicates judgment (blue: short; red: long). (b-g) Population state and decoded time for a single short, near boundary stimulus interval (1.38 s). (b) Green curve is the population state trajectory for long judgment trials. Red dots are 6 time points evenly spaced between interval onset and offset. Blue dots are projections of population state during short judgment trials. Grey lines link population states at equivalent time points. (c) Average cumulative distance travelled in full neural space along trajectory represented in (b) on long versus short judgment trials. (d) Posterior probability of time given population state at the time points indicated in (b), averaged within trials of each judgment type. (e,f) Same as (d) for the entire interval period. (g) Difference between posteriors for long and short judgment trials. Arrowheads indicate same time points used in (b,d).
